# Supplementary material for: Roots in Health Disparities among European Regions
Source: Research Square preprint supplement (doi:10.21203/rs.3.rs-4622982/v1), 2024-11-08
Supplement: Supplementary file 1 [file 55760cd6ae0b34a304495a03.docx]

Annex 1
