# Supplementary material for: Roots in Health Disparities among European Regions
Source: Research Square preprint supplement (doi:10.21203/rs.3.rs-4622982/v1), 2024-11-08
Supplement: Supplementary file 2 [file c7f9b392eccc963fb1fd83fe.docx]

Tables

Table 1. Predicting health status at NUTS 3 level

| Data source: EUROSTAT. Own computations. OLS regressions in STATA 16. Robust standard errors. Colinearity effects, identified by VIF command in STATA, were avoided by eliminating dummies of counties generating VIF that are higher than 4. Very small countries like MT, EE, LV, CY were eliminated from the series of country predictors. West Germany was also eliminated from the list of predictors to avoid collinearity. Shadow marks significant coefficients for p<0.05. Urbanisation and competitiveness are factor scores in a separate PCA. Urbanization factor aggregates urbanity of NUTS 3, density, and having not the capital city of the country in the reference NUTS region. All the variables for the factor score competitiveness are measured at the NUTS 2 level. It aggregates regional competitiveness, education of the population of more than 25 years old, net migration rate, and NEET measures the percentage of people 15-29 years old that are neither in employment nor in education institutions. |
| --- |
